# Supplementary material for: Cell circuits between B cell progenitors and IL-7+ mesenchymal progenitor cells control B cell development
Source: PubMed Central journal article supplement — J Exp Med. 2018 Oct 1;215(10):2586–99. doi: 10.1084/jem.20180778 (PMC6170173; doi:10.1084/jem.20180778), 2018-10-01
Supplement: JEM_20180778_sm.pdf [file JEM_20180778_sm.pdf]

## Supplemental material

Fistonich et al., <https://doi.org/10.1084/jem.20180778>

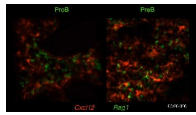

Video 1. **Intravital imaging of proB and preB cells.** Lethally irradiated *Cxcl12<sup>dsRed/+</sup>* mice were reconstituted with BM cells from *Rag1<sup>GFP/GFP</sup>* (ProB, left) or from *Rag1<sup>GFP/GFP</sup> Igh<sup>3-83/+</sup>* (PreB, right) mice. IVM of BM calvaria was performed 4–6 wk after hematopoietic reconstitution. Time-lapse image sequences (60-µm z stack) of BM calvaria showing proB (left) and preB (right) cells (GFP<sup>+</sup>, green). CXCL12-producing cells are shown in red. Elapsed time is shown as hours/minutes/seconds. Data are representative of more than three independent experiments.

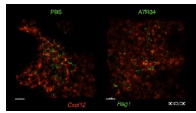

Video 2. **Intravital imaging of proB cells in mice treated with IL-7Ra blocking antibody.** Lethally irradiated *Cxcl12<sup>dsRed/+</sup>* mice reconstituted with BM cells from *Rag1<sup>GFP/GFP</sup>* and proB cells were visualized by IVM 4–6 wk after hematopoietic reconstitution. Time-lapse image sequences (60-µm z stack) of BM calvaria showing proB cells (GFP<sup>+</sup>) in mice treated with IL-7Ra antibody (right) or with isotype control (left) 36 h before IVM. Elapsed time is shown as hours/minutes/seconds. Data are representative of two independent experiments. Scale bars, 50 µm.

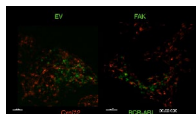

Video 3. **Intravital imaging of BCR-ABL-expressing preB leukemic cells.** EV- or FAK-transduced BCR-ABL<sup>+</sup> preB cells were adoptively transferred into *Cxcl12<sup>dsRed/+</sup>* mice for 14 d. Time-lapse image sequences (60-µm z stack) of BM calvaria showing EV-transduced BCR-ABL<sup>+</sup> preB cells (left, GFP<sup>+</sup>) and FAK-transduced BCR-ABL<sup>+</sup> preB cells. Elapsed time is shown as hours/minutes/seconds. Data are representative of multiple videos from two individual imaging experiments. Scale bars, 50 µm.
